# Supplementary material
Source: PubMed Central journal article supplement (PMC6645978)

# Supporting Information

*for*

## Distributed Representation of Chemical Fragments

Suman K. Chakravarti<sup>\*,†</sup>

<sup>†</sup>MultiCASE Inc., 23811 Chagrin Blvd., Suite 305, Beachwood, OH 44122, USA

<sup>\*</sup>E-mail: [chakravarti@gmail.com](mailto:chakravarti@gmail.com)

Phone: +1-216-831-3740

# 1. Query Ligands for the 26 Kinase Targets

Obtained from: <http://dude.docking.org>.

## Reference:

Mysinger, M. M.; Carchia, M.; Irwin, J. J.; Shoichet, B. K. Directory of useful decoys, enhanced (DUD-E): better ligands and decoys for better benchmarking. *J. Med. Chem.* **2012**, *55*, 6582–6594.

| Kinase Target | Query Ligand SMILES                                                                           |
|---------------|-----------------------------------------------------------------------------------------------|
| abl1          | <chem>CN1C(=O)C(=Cc2cnc(Nc3ccc(F)c(C)c3)nc12)c4c(Cl)cccc4Cl</chem>                            |
| akt1          | <chem>[H][n]1cnc2CCN(Cc21)c3ncnc4c3c(Cl)c[n]4[H]</chem>                                       |
| akt2          | <chem>CC[n]1c(nc2c(ncc(OCC3CCCNC3)c21)C#CC(C)(C)O)c4n[o]nc4N</chem>                           |
| braf          | <chem>ONC1C=CC2C=C(C=CC2=1)c3c[n](nc3c4cncnc4)C5CCNCC5</chem>                                 |
| cdk2          | <chem>CN(C)CC(O)COc1ccc(Nc2cc(Nc3c(F)cccc3F)nen2)cc1</chem>                                   |
| csf1r         | <chem>[H][n]1cc(nc1C(=O)Nc2ccc(cc2C3CCCCC=3)C4CCNCC=4)C#N</chem>                              |
| egfr          | <chem>Nc1ncnc(Nc2ccc3c(en[n]3Cc4cccc(F)c4)c2)c1CNN5CCCCC5</chem>                              |
| fak1          | <chem>CN(c1ncccc1CNc2nc(Nc3cc[c]4=NC(=O)C=[c]4c3)ncc2C(F)(F)F)S(C)(=O)=O</chem>               |
| fgfr1         | <chem>[H][n]1cc(Cc2cccc(OC)c2)c3ccnc31</chem>                                                 |
| igf1r         | <chem>[H][n]1c(nc2cc(cc(C)c21)[n]3ccnc3)C4C(=O)NC=CC=4NCc5ccccc5</chem>                       |
| jak2          | <chem>CNS(=O)(=O)c1ccc(cc1)c2cccc3ncc(nc32)c4cc(OC)c(OC)c(OC)c4</chem>                        |
| kit           | <chem>[H][n]1c(C)c(C(N)=O)c(C)c1C=C2C(=O)Nc3ccc(F)cc32</chem>                                 |
| kpcb          | <chem>[H][n]1c(C)c(c2cccc21)C3C(=O)NC(=O)C=3c4c(C)[n](CCCN(C)C)c5ccccc54</chem>               |
| lck           | <chem>C1CN(CCN1)CCNc2cnc3[o]c(c4cccc4)c(c5ccccc5)c23</chem>                                   |
| mapk2         | <chem>[H][n]1c2c(CCc3cnc(cc32)c4cccc4F)c5C(=O)N=CC6(CN(C)C6)c51</chem>                        |
| met           | <chem>COc1cc2c(Oc3ccc(NC(=O)C4(CC4)C(=O)Nc5ccc(F)cc5)cc3F)ccnc2cc1OCCCN6CCOCC6</chem>         |
| mk01          | <chem>[H][n]1cc(cc1C(=O)N(C)C)c2c(en[n]2[H])c3ccccc3</chem>                                   |
| mk10          | <chem>CCC(=O)C1N(Cc2ccc(cc2)C(O)=O)C(=O)c3ccc(Cl)cc3C=1c4ccccc4</chem>                        |
| mk14          | <chem>[H][n]1cc(C(=O)C(=O)N2CCC(O)C2)c3cc(C(=O)N4CC[n]5c(C4)cnc5c6ccc(F)cc6F)c(OC)nc31</chem> |
| mp2k1         | <chem>NC(Sc1ccccc1N)=C(C#N)C(C#N)=C(N)Sc2ccccc2N</chem>                                       |
| plk1          | <chem>[H][n]1nc(NC(=O)c2ccc(cc2)N3CCN(C)CC3)c4c[n](cc41)C(=O)Cc5ccc[s]5</chem>                |
| rock1         | <chem>CC(N)C1CCC(CC1)C(=O)Nc2ccnc2</chem>                                                     |
| src           | <chem>CC(C)[n]1nc(c2ccc(NC(=O)Nc3ccccc3)C(F)(F)F)cc2)c4c(N)ncnc41</chem>                      |
| tgfr1         | <chem>Cc1cccc(n1)c2nc(Nc3ccnc3)c4cccc4n2</chem>                                               |
| vgfr2         | <chem>O=C(Nc1ccc(Oc2ccccc2)cc1)c3ccnc3NCc4ccnc4</chem>                                        |
| wee1          | <chem>CN(C)CCCOc1cc2c(cc1O)c3c(cc(c4cccc4Cl)c5C(=O)NC(=O)c53)[n]2C</chem>                     |

## 2. Recall Plots for Kinase Ligands

Recall plots for kinase ligands from decoys. The plots cover 26 kinase targets and three different fingerprints – orange lines for DISTRIB\_FP\_300, blue for FRAG\_FP\_1024 and green for CACTVS\_881. DISTRIB\_FP\_300 were computed by averaging fragment vectors obtained from skip-gram architecture.

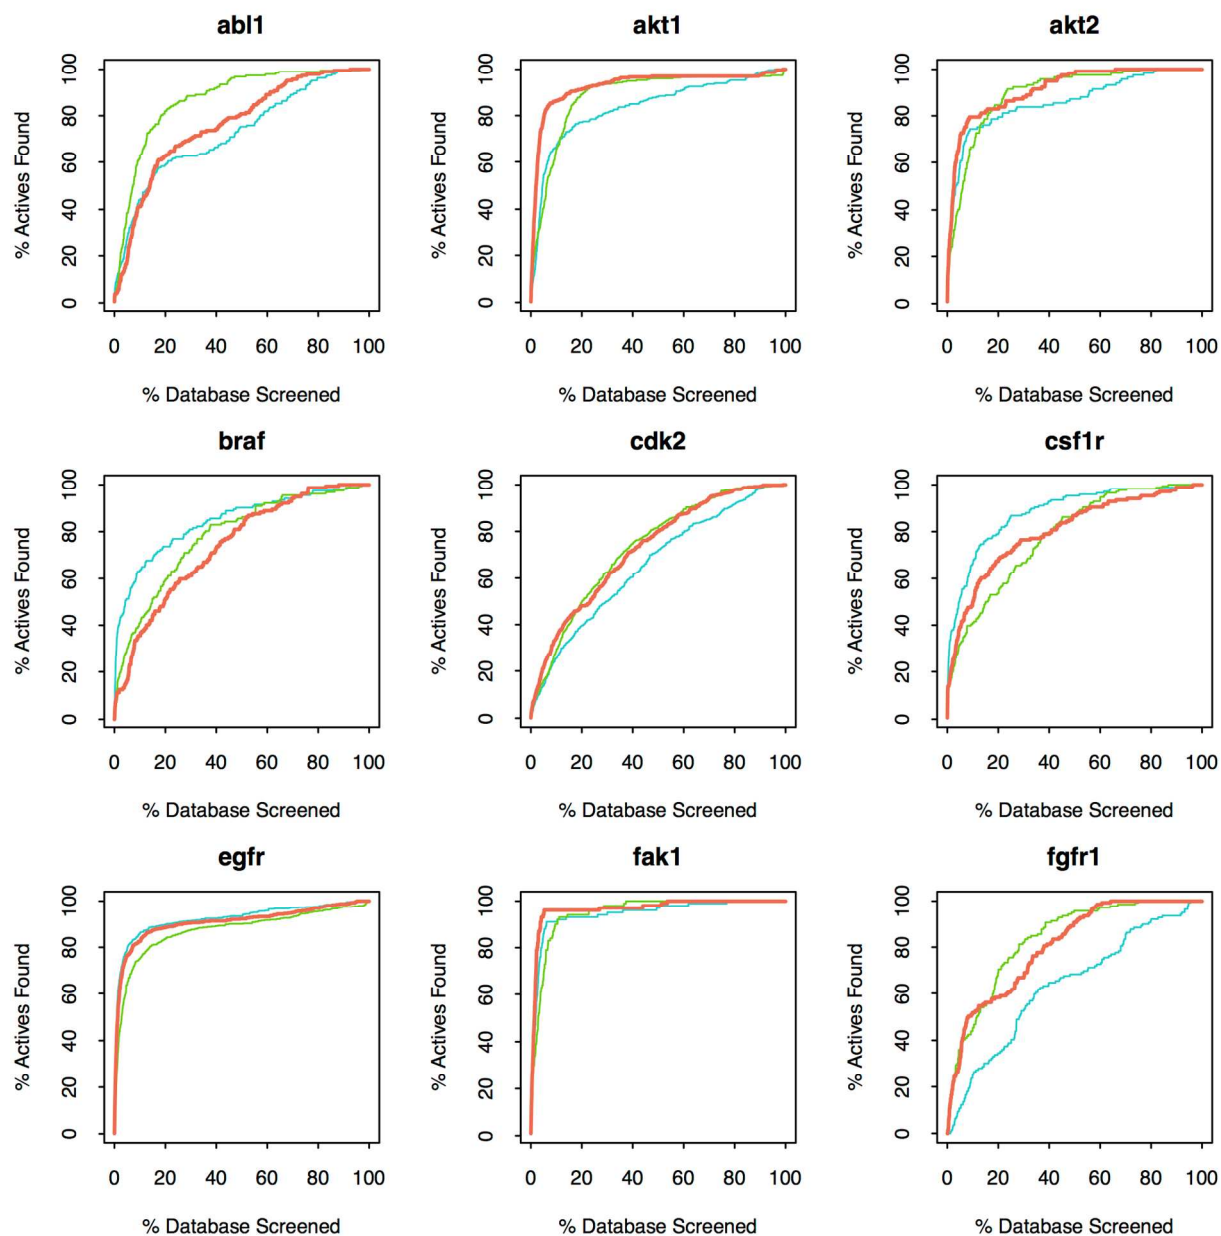

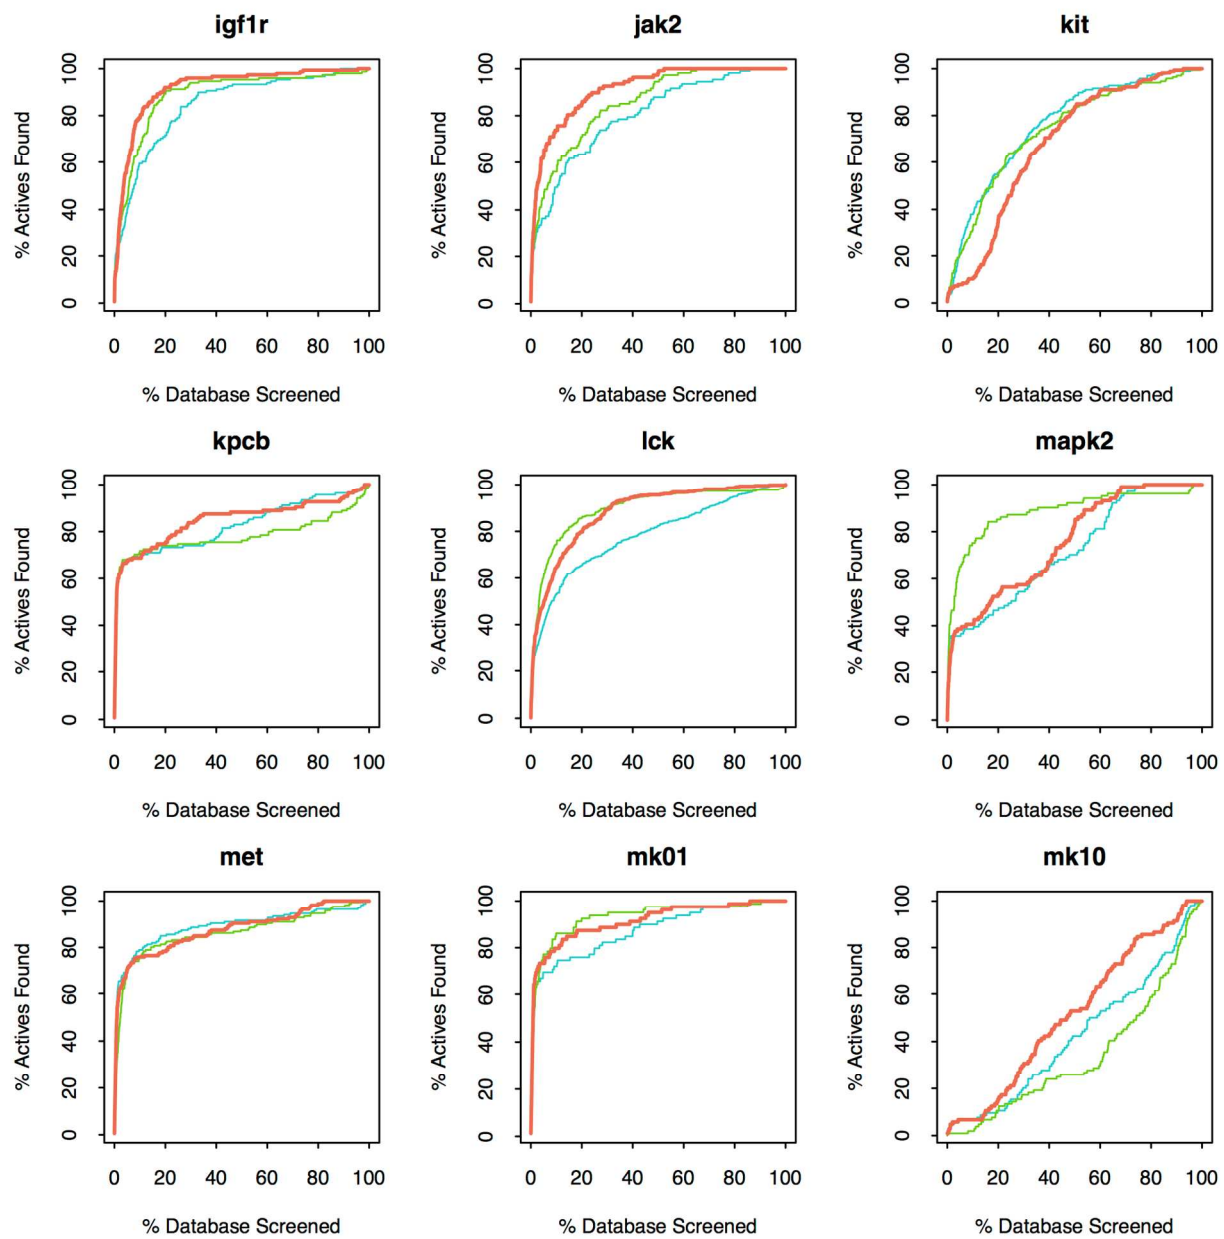

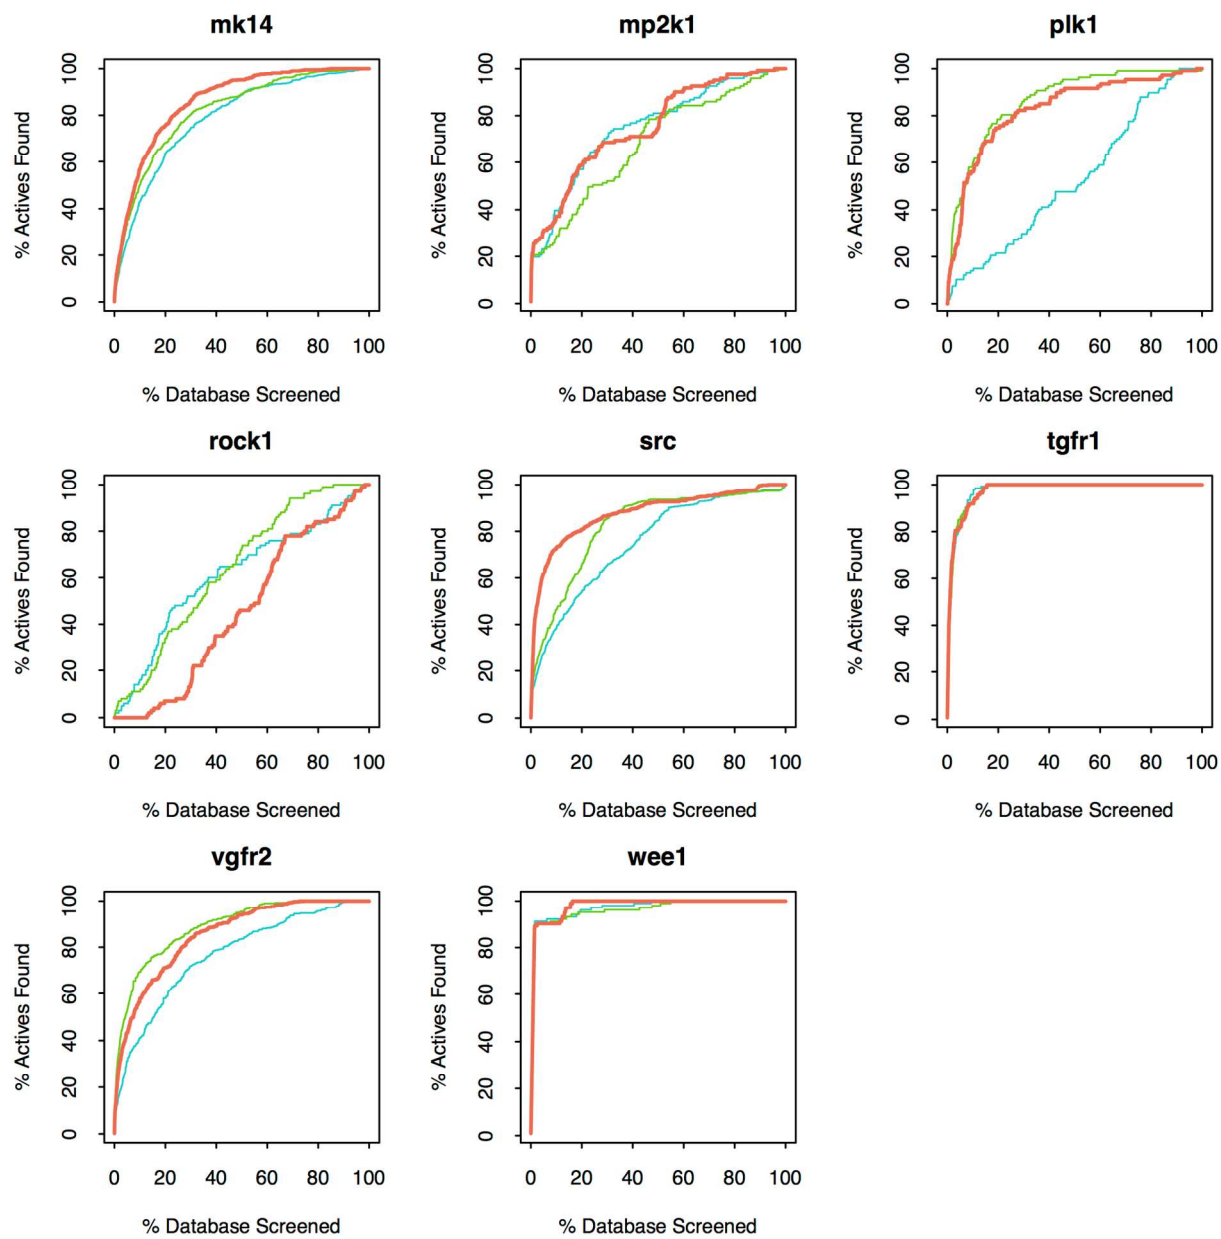

### 3. SMILES of chemicals not covered by the distributed vectors

These chemicals are from different datasets employed in the binary classification and the QSAR section of the manuscript.

| Mutagenicity dataset | Anti-HIV dataset | Tetrahymena Dataset | LogP dataset |
|----------------------|------------------|---------------------|--------------|
| [C-]#[O+]            | [Li]F            | CO                  | C=C          |
| C#N                  | [Li]Cl           |                     | CBr          |
| ClCl                 |                  |                     | C#C          |
| C=O                  |                  |                     | CF           |
| CBr                  |                  |                     | CC           |
| C=C                  |                  |                     | Cl           |
| CCl                  |                  |                     | CO           |
| CN                   |                  |                     |              |
| CO                   |                  |                     |              |

### 4. Mutagenicity and anti-HIV Prediction performance as a function of different threshold values (in contrast to p-values)

4.1 Performance of the three fingerprints in 10-fold cross-validation exercise for predicting mutagenicity using k-nearest neighborhood method.

| Similarity Threshold ->                               | 0.0                | 0.6                | 0.7               | 0.8               | 0.9               |
|-------------------------------------------------------|--------------------|--------------------|-------------------|-------------------|-------------------|
| <b>p-Value, Sensitivity%, Specificity%, Coverage%</b> |                    |                    |                   |                   |                   |
| DISTRIB_FP_300*                                       | 1.000, 80, 74, 100 | 0.845, 80, 74, 100 | 0.676, 80, 74, 98 | 0.373, 81, 75, 96 | 0.053, 84, 75, 86 |
| FRAG_FP_1024                                          | 1.000, 79, 73, 100 | 0.000, 86, 74, 71  | 0.000, 88, 76, 56 | 0.000, 90, 76, 37 | 0.000, 90, 80, 16 |
| CACTVS_881                                            | 1.000, 82, 74, 100 | 0.006, 82, 75, 98  | 0.001, 84, 75, 91 | 0.000, 87, 76, 78 | 0.000, 89, 77, 52 |

\*DISTRIB\_FP\_300 were computed by averaging fragment vectors obtained from skip-gram architecture.

4.2 Performance of the three fingerprints in 10-fold cross-validation exercise for predicting anti-HIV using k-nearest neighborhood method.

| Similarity Threshold ->                               | 0.0 | 0.6 | 0.7 | 0.8 | 0.9 |
|-------------------------------------------------------|-----|-----|-----|-----|-----|
| <b>p-Value, Sensitivity%, Specificity%, Coverage%</b> |     |     |     |     |     |

|                 |                       |                       |                       |                      |                      |
|-----------------|-----------------------|-----------------------|-----------------------|----------------------|----------------------|
| DISTRIB_FP_300* | 1.000, 57,<br>91, 100 | 0.845, 57,<br>91, 100 | 0.676, 57,<br>91, 100 | 0.373, 58,<br>91, 98 | 0.053, 64,<br>90, 81 |
| FRAG_FP_1024    | 1.000, 60,<br>92, 100 | 0.000, 83,<br>86, 44  | 0.000, 86,<br>86, 33  | 0.000, 87,<br>86, 21 | 0.000, 89,<br>88, 8  |
| CACTVS_881      | 1.000, 58,<br>92, 100 | 0.006, 60,<br>91, 92  | 0.001, 71,<br>88, 68  | 0.000, 79,<br>85, 43 | 0.000, 86,<br>84, 21 |

\*DISTRIB\_FP\_300 were computed by averaging fragment vectors obtained from skip-gram architecture.

## 5. Results obtained by using fragment vectors obtained from Continuous bag-of-words (CBOW) architecture

5.1 Using CBOW produced vectors for prediction of LogP and MR contribution (vertical axis) of 4-atom linear fragments using 5 closest fragments in the high dimensional vector space.

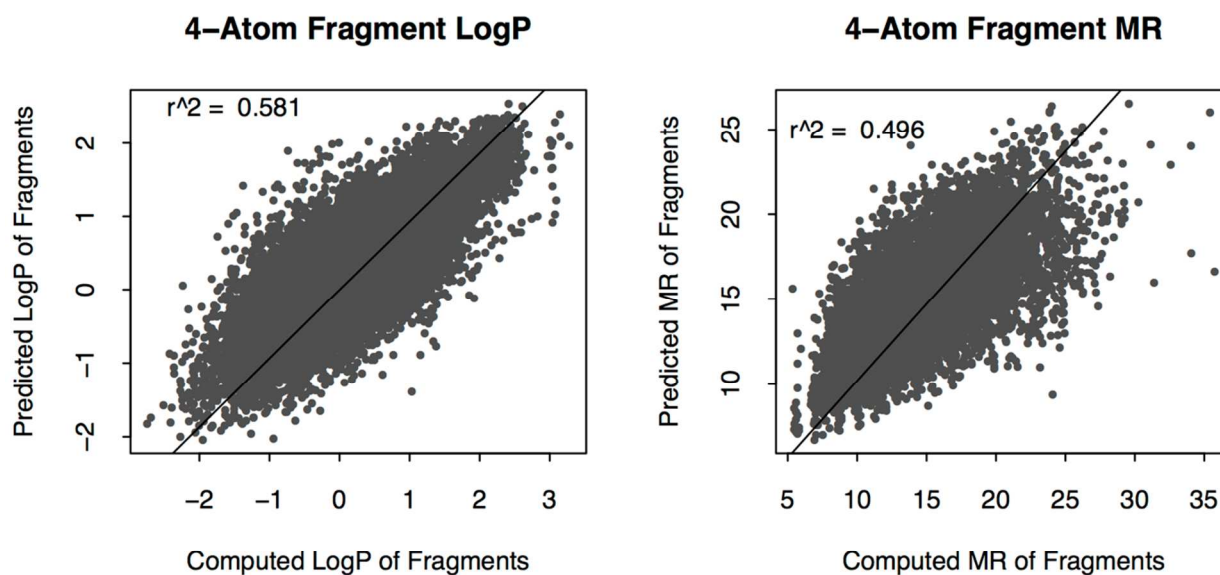

5.2 Percentage of recalled kinase ligands using distributed fingerprints computed by averaging fragment vectors obtained from CBOW architecture.

| Kinase target | # Ligands | # Decoys | Distributed FP (CBOW) |                  |                   |
|---------------|-----------|----------|-----------------------|------------------|-------------------|
|               |           |          | PR <sub>1%</sub>      | PR <sub>5%</sub> | PR <sub>10%</sub> |
| abl1          | 182       | 10749    | 5.5                   | 19.2             | 32.4              |
| akt1          | 293       | 16439    | 15.4                  | 68.6             | 82.3              |
| akt2          | 117       | 6900     | 29.1                  | 65.8             | 77.8              |
| braf          | 152       | 9950     | 9.2                   | 32.9             | 47.4              |
| cdk2          | 474       | 27846    | 4.0                   | 11.4             | 20.5              |

|       |     |       |      |      |      |
|-------|-----|-------|------|------|------|
| csflr | 166 | 12149 | 15.1 | 31.9 | 47.6 |
| egfr  | 542 | 35049 | 45.6 | 77.5 | 82.5 |
| fak1  | 100 | 5350  | 34.0 | 69.0 | 91.0 |
| fgfr1 | 139 | 8700  | 7.2  | 25.2 | 41.7 |
| igflr | 148 | 9300  | 17.6 | 49.3 | 68.9 |
| jak2  | 107 | 6498  | 20.6 | 43.9 | 61.7 |
| kit   | 166 | 10450 | 3.0  | 6.6  | 12.7 |
| kpcb  | 135 | 8697  | 61.5 | 68.1 | 71.1 |
| lck   | 420 | 27396 | 24.5 | 47.4 | 61.0 |
| mapk2 | 101 | 6145  | 13.9 | 30.7 | 34.7 |
| met   | 166 | 11250 | 28.3 | 56.0 | 64.5 |
| mk01  | 79  | 4547  | 49.4 | 70.9 | 75.9 |
| mk10  | 104 | 6600  | 2.9  | 6.7  | 6.7  |
| mk14  | 578 | 35850 | 8.8  | 36.5 | 53.3 |
| mp2k1 | 121 | 8148  | 21.5 | 28.1 | 33.9 |
| plk1  | 107 | 6800  | 3.7  | 11.2 | 24.3 |
| rock1 | 100 | 6300  | 0.0  | 0.0  | 0.0  |
| src   | 524 | 34494 | 21.4 | 46.0 | 59.7 |
| tgfr1 | 133 | 8500  | 45.1 | 82.7 | 94.0 |
| vgfr2 | 409 | 24949 | 11.7 | 30.8 | 41.3 |
| wee1  | 102 | 6149  | 61.8 | 90.2 | 90.2 |

**5.3. Performance of distributed fingerprints obtained from CBOW in 10-fold cross-validation exercise for predicting mutagenicity using k-nearest neighborhood method.**

| Similarity Threshold ->                      | <b>0.0</b>  | <b>0.6</b>  | <b>0.7</b> | <b>0.8</b> | <b>0.9</b> |
|----------------------------------------------|-------------|-------------|------------|------------|------------|
| <b>Sensitivity%, Specificity%, Coverage%</b> |             |             |            |            |            |
| Distributed vector FP, 300 elements (CBOW)   | 78, 73, 100 | 78, 73, 100 | 78, 73, 98 | 80, 74, 93 | 84, 73, 77 |

**5.4. Performance of the fingerprints obtained from CBOW in 10-fold cross-validation exercise for predicting mutagenicity using k-nearest neighborhood method.**

| Similarity Threshold -> | <b>0.0</b> | <b>0.6</b> | <b>0.7</b> | <b>0.8</b> | <b>0.9</b> |
|-------------------------|------------|------------|------------|------------|------------|
|-------------------------|------------|------------|------------|------------|------------|



|                            | Sensitivity%, Specificity%, Coverage% |             |            |            |            |
|----------------------------|---------------------------------------|-------------|------------|------------|------------|
| Distributed vector         |                                       |             |            |            |            |
| FP, 300 elements<br>(CBOW) | 56, 92, 100                           | 57, 92, 100 | 58, 92, 97 | 62, 91, 85 | 77, 88, 53 |

5.5 Observed vs predicted plots for toxicity against *T. pyriformis* and LogP using QSARs built using distributed fingerprints computed using CBOW architecture.

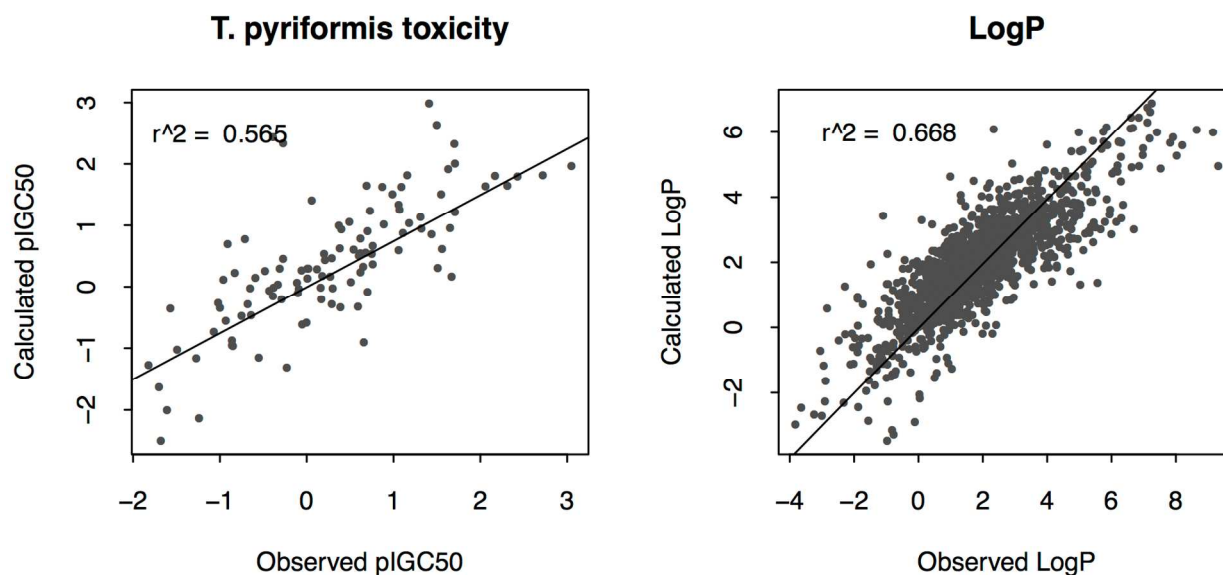

Supplement: ao7b02045_si_001.pdf [file ao7b02045_si_001.pdf]
